# Supplementary material for: Longitudinal Assessment of Flood Impacts on Water and Sanitation Resilience: Satellite Based Evidence from Community Health Units in Kilifi, Kenya
Source: Research Square preprint supplement (doi:10.21203/rs.3.rs-8318883/v1), 2025-12-18
Supplement: Supplementary file 1 [file 4add7244894844b6885d7cf4.xlsx]

## Sheet: Sheet2
(a) Safe water coverage (CHU round observations)
Statistic	Peri urban CHUs (33 CHU rounds)	Rural CHUs (77 CHU rounds)
Mean (%)	86.4	24.3
Standard deviation	13.5	32.1
Minimum (%)	45.9	0.3
25th centile (%)	74.2	2.3
Median (%)	90.4	6.2
75th centile (%)	97.1	49.1
Maximum (%)	99.9	96.9
(b) Functional latrine coverage (CHU round observations)
Statistic	Peri urban CHUs (33 CHU rounds)	Rural CHUs (77 CHU rounds)
Mean (%)	86.9	63.6
Standard deviation	10.5	25
Minimum (%)	56.1	20.3
25th centile (%)	81	38.5
Median (%)	91	68.2
75th centile (%)	95.3	86
Maximum (%)	96.9	98.3
Notes
• Each observation is a CHU level percentage for one survey round. • Peri urban category includes Buni, Mwele Kisurutini and Vishakani. • Rural category includes Kibwabwani, Kombeni, Kwale, Mnazimwenga, Mutsengo, Tsangatsini and Viragoni.
