# Supplementary material for: Longitudinal Assessment of Flood Impacts on Water and Sanitation Resilience: Satellite Based Evidence from Community Health Units in Kilifi, Kenya
Source: Research Square preprint supplement (doi:10.21203/rs.3.rs-8318883/v1), 2025-12-18
Supplement: Supplementary file 2 [file b1a2b3158e47c2efdfaefd10.xlsx]

## Sheet: Sheet3
Fixed effects
Predictor	Coefficient (β)	Standard error	z value	p value	95% CI lower	95% CI upper
Intercept	63.21	8.08	7.82	<0.001	47.37	79.05
flood_z	0.86	1.02	0.85	0.4	−1.13	2.85
is_latrine_ec	19.89	2.06	9.65	<0.001	15.85	23.93
flood_z × is_latrine_ec	−5.63	1.89	−2.98	0.003	−9.33	−1.93
setting_ec	−32.18	20.86	−1.54	0.12	−73.06	8.7
is_latrine_ec × setting_ec	38.9	4.12	9.43	<0.001	30.82	46.99
elev_z	−15.94	8.93	−1.79	0.07	−33.43	1.56
water_z	−4.16	2.25	−1.84	0.07	−8.58	0.26
rangeland_z	4.19	8.54	0.49	0.62	−12.55	20.93
trees_z	0.36	5.04	0.07	0.94	−9.51	10.23
crops_z	3.17	3.73	0.85	0.4	−4.14	10.48
bare_ground_z	−3.89	2.22	−1.76	0.08	−8.24	0.45
Random effects and residual variance
Component	Estimate
Between CHU variance	470.33
Residual variance (Scale)	196.4
Notes
• Dependent variable is percentage coverage (safe water or functional latrine). • is_latrine_ec is effect coded: −0.5 for safe water and 0.5 for latrine. • setting_ec is effect coded: −0.5 for peri urban and 0.5 for rural. • flood_z, elev_z, round_z and land cover covariates (water_z, rangeland_z, trees_z, crops_z, bare_ground_z) are standardised to mean 0 and standard deviation 1. • The intercep…
