# Supplementary material for: Longitudinal Assessment of Flood Impacts on Water and Sanitation Resilience: Satellite Based Evidence from Community Health Units in Kilifi, Kenya
Source: Research Square preprint supplement (doi:10.21203/rs.3.rs-8318883/v1), 2025-12-18
Supplement: Supplementary file 3 [file be28cc70469b79718256c63c.xlsx]

## Sheet: Sheet1
CHU	Setting	Mean safe water (%)	Mean functional latrine (%)	Mean flood frequency (% of CHU area)	Built up area (% of CHU area)	Water (%)	Rangeland (%)	Trees (%)	Crops (%)	Bare ground (%)	Mean elevation (m)	Mean RWI
Buni	Peri urban	92.8	79.7	7	24.1	0.2	43.3	30.8	0.2	0.1	118.4	0.2
Kibwabwani	Rural	5.4	81.3	4.6	0.8	0.1	89	9.9	0	0	280.4	−0.3
Kombeni	Rural	87.8	84.1	9.3	17.4	0	67.1	4.1	8.4	0	163.4	0
Kwale	Rural	52.7	93.5	6.6	10.7	0	33	34.9	17.1	0	193.8	−0.2
Mnazimwenga	Rural	5.6	38.8	8.7	0.2	0	92.9	7	0	0	211.7	−0.3
Mutsengo	Rural	7.8	67.2	5	0.2	0	77.1	21.9	0.7	0	241.5	−0.5
Mwele Kisurutini	Peri urban	97	90.4	7.9	47.6	0	33.5	7.1	8.1	0	158.1	0.4
Tsangatsini	Rural	5.3	29.2	10.4	0.3	0	86.9	12.7	0	0	205.6	−0.4
Viragoni	Rural	5.6	51.3	5.2	0	0	79.6	20.3	0.1	0	241.3	−0.3
Vishakani	Peri urban	69.4	90.6	6	31.1	0	50.2	4.5	11.9	0	207.6	0.5
Notes
• Values are means across 11 survey rounds for each CHU. • Flood frequency is the mean percentage of CHU area classified as flooded across the study period. • Land cover classes and built-up areas are expressed as percentages of CHU area. • RWI is a standardized wealth index; higher values indicate higher relative wealth.
