# Supplementary material for: Longitudinal Assessment of Flood Impacts on Water and Sanitation Resilience: Satellite Based Evidence from Community Health Units in Kilifi, Kenya
Source: Research Square preprint supplement (doi:10.21203/rs.3.rs-8318883/v1), 2025-12-18
Supplement: Supplementary file 4 [file d92574fd985e9037489bf000.xlsx]

## Sheet: Sheet4
(a) Mixed effects model (random intercept for CHU)
Statistic	Value
Number of observations	220
Number of CHUs (groups)	10
Minimum group size (CHU rounds)	22
Maximum group size (CHU rounds)	22
Mean group size	22
Log likelihood (REML)	−882.01
AIC (from REML log likelihood)	1790.02
BIC (from REML log likelihood)	1834.14
Between CHU variance	470.33
Residual variance	196.4
Total variance	666.73
Intraclass correlation coefficient	0.71
(b) Ordinary least squares model (no random effects)
Statistic	Value
Log likelihood	−951.19
AIC	1926.37
BIC	1967.09
Notes
• The mixed effects model and ordinary least squares model use the same fixed effect structure. • AIC and BIC for the mixed effects model are calculated from the restricted maximum likelihood log likelihood and are presented for transparency. They are not strictly directly comparable to the OLS AIC and BIC, but they provide a consistent indication that the mixed effects model offers a better fit …
